# Supplementary material for: Dipolar glass and magneto-electric coupling within a π-stacked organic system
Source: Royal Society of Chemistry journal article supplement (doi:10.1039/c6tc01538g), 2016-01-01
Supplement: c6tc01538g1.pdf [file c6tc01538g1.pdf]

# Supplementary Information: Dipolar glass and magneto-electric coupling within a $\pi$ -stacked organic system

Adam Berlie, Ian Terry, Yun Liu and Marek Szablewski

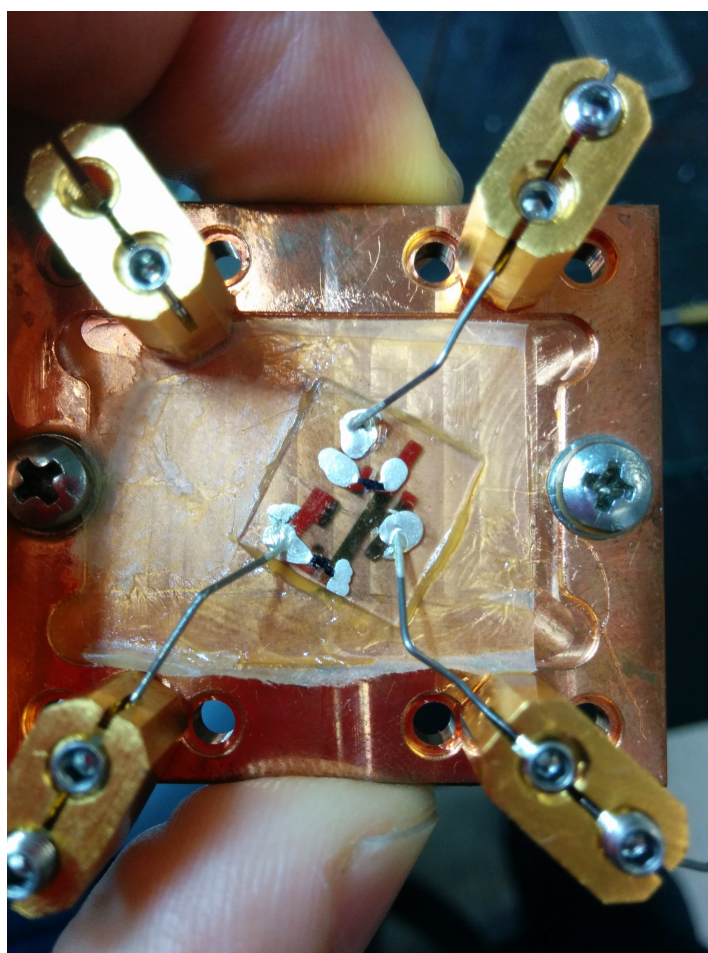

Figure 1: Example of a sapphire wafer with gold contacts used to perform measurements on the TEA(TCNQ)<sub>2</sub> needles.

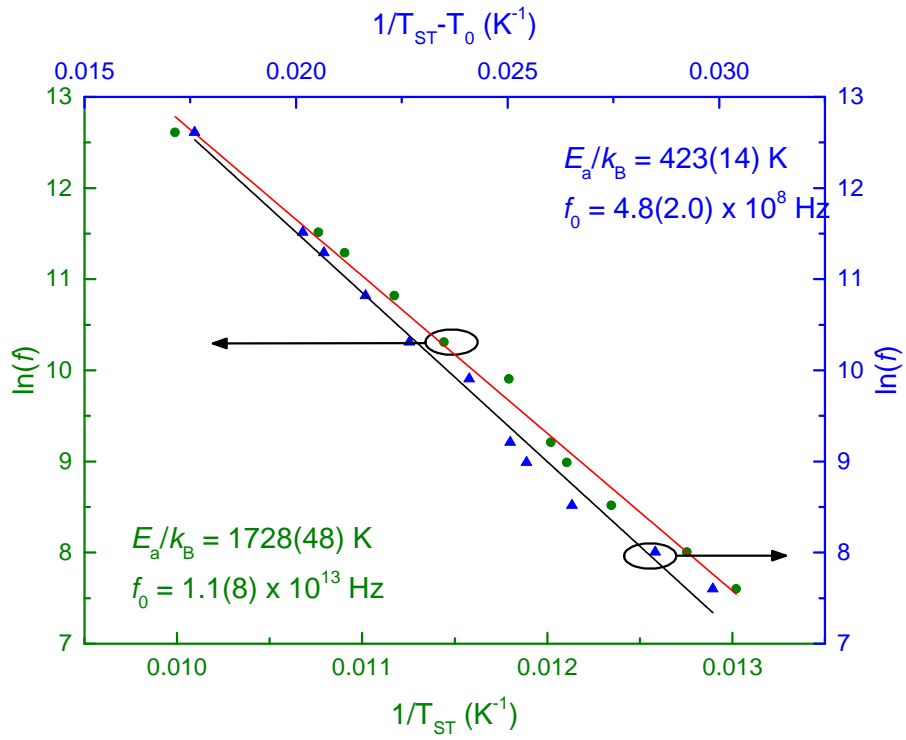

Figure 2: Analysis of the frequency dependence of the anomaly in the dielectric data associated with singlet-triplet transition ( $T_{ST}$ ) using both an Arrhenius and Vogel-Fulcher behaviour. *Note, all errors are given in brackets.*
